# Supplementary material for: Ratio-Based Analysis of Differential mRNA Processing and Expression of a Polyadenylation Factor Mutant pcfs4 Using Arabidopsis Tiling Microarray
Source: PubMed Central journal article supplement (PMC3045369; doi:10.1371/journal.pone.0014719), 2011-02-25

Figure S1. The probe intensities along the FCA gene and the gene At5g46490 and their surrounding intergenic regions.

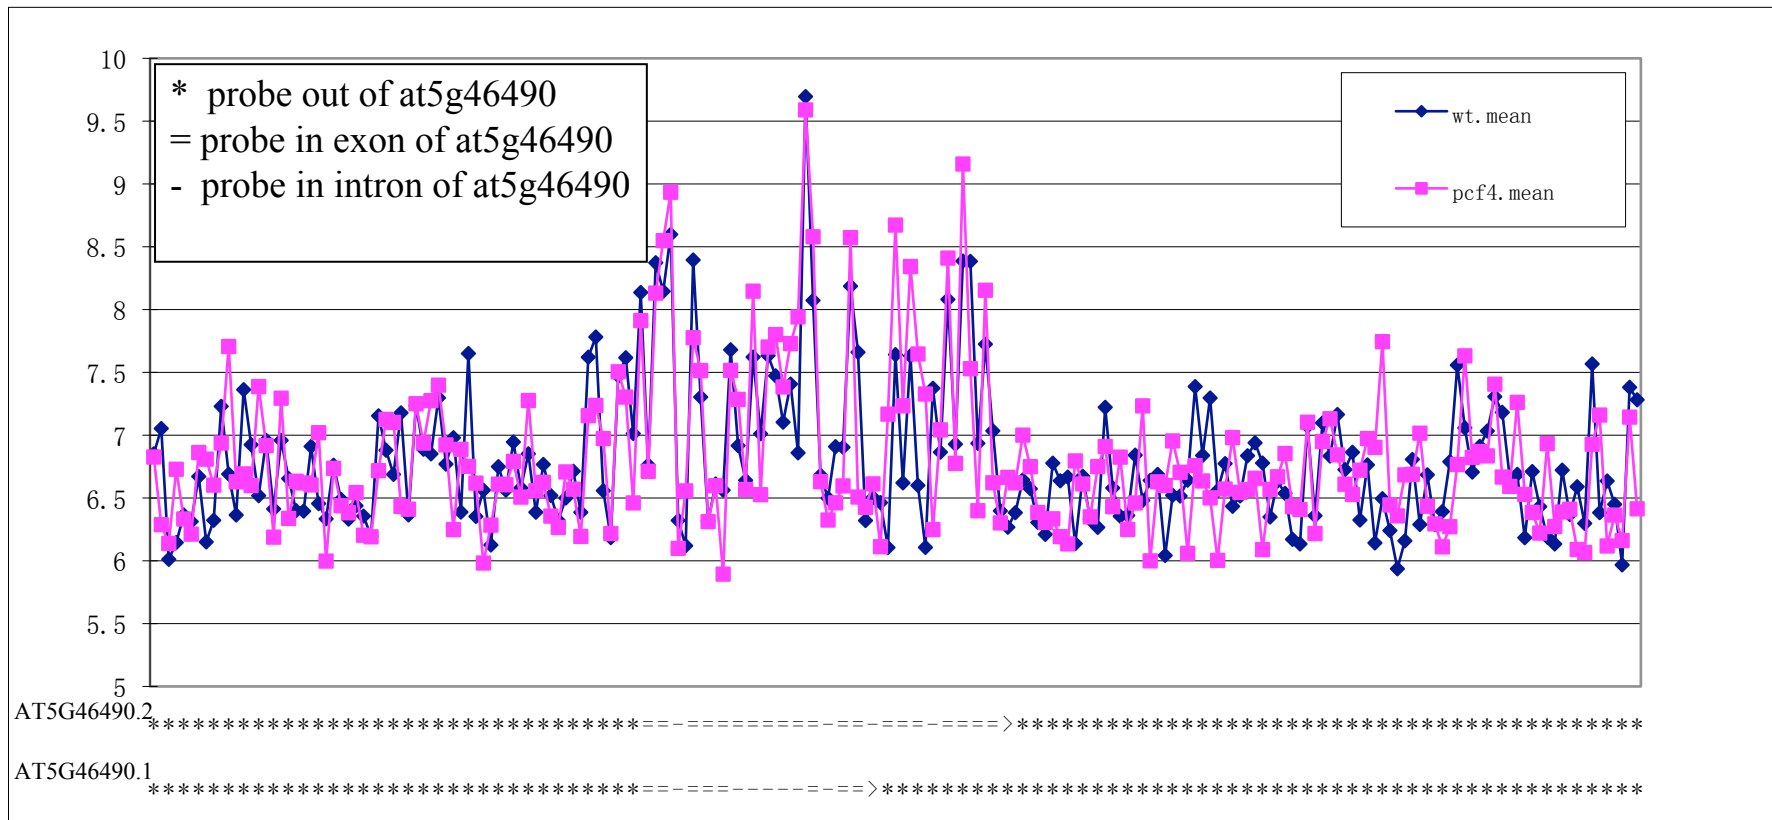

Figure S1. (Continued).

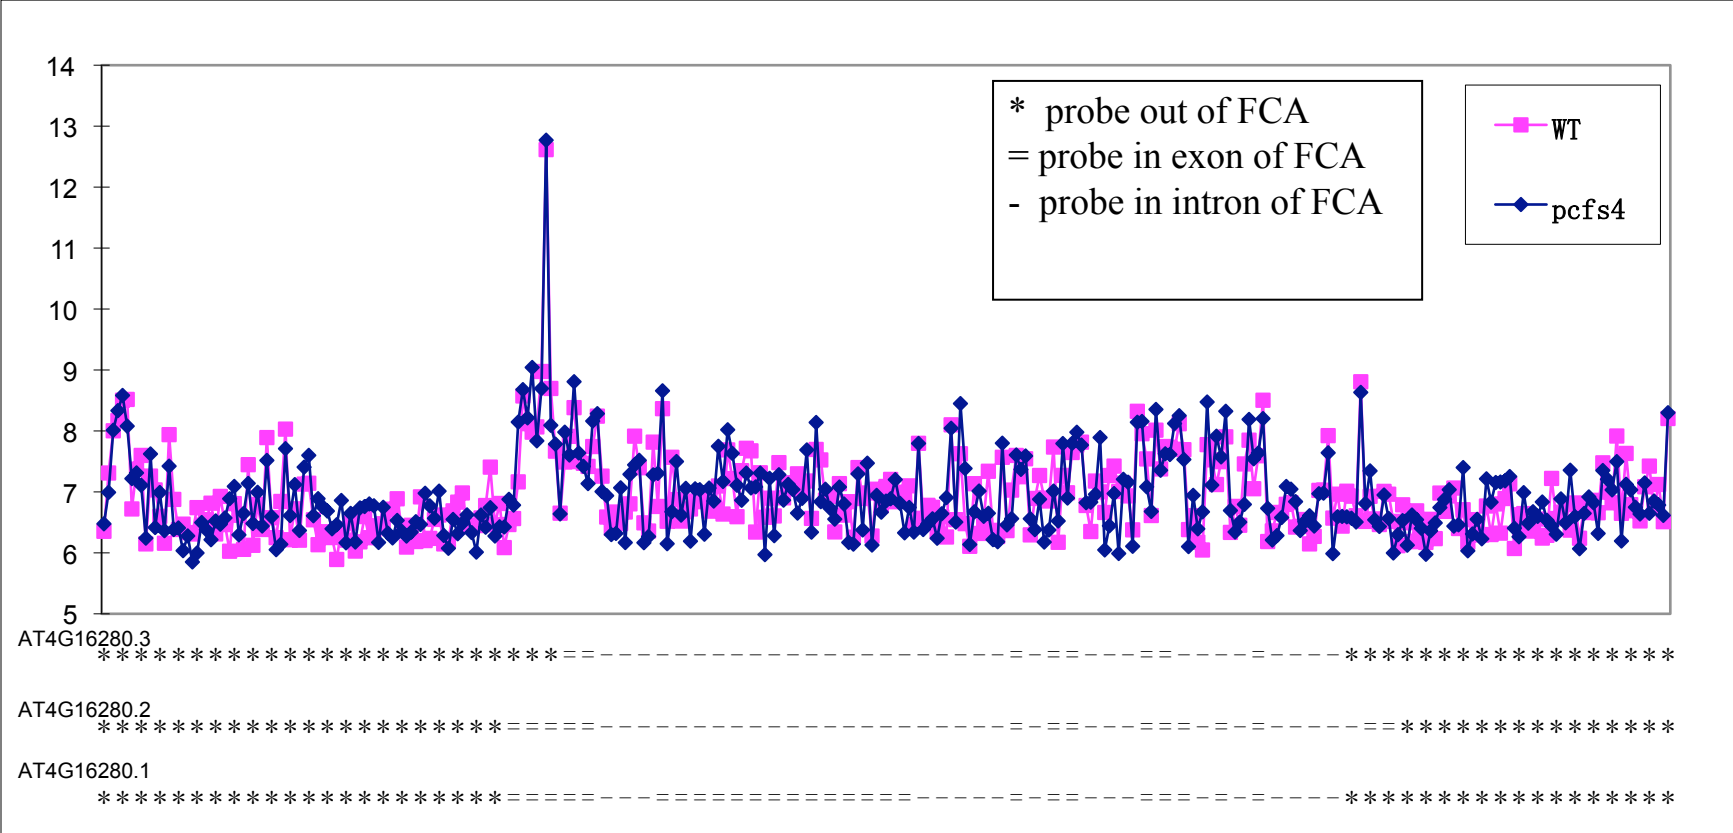

Supplement: pone.0014719.s001.pdf [file pone.0014719.s001.pdf]
