# Supplementary material for: Ratio-Based Analysis of Differential mRNA Processing and Expression of a Polyadenylation Factor Mutant pcfs4 Using Arabidopsis Tiling Microarray
Source: PubMed Central journal article supplement (PMC3045369; doi:10.1371/journal.pone.0014719), 2011-02-25
Supplement: pone.0014719.s002.pdf [file pone.0014719.s002.pdf]

**Table S1.** One-Sample Kolmogorov-Smirnov Test of the ratio distribution before and after log-transformation

| Sample size | p-value   |                       |
|-------------|-----------|-----------------------|
|             | ratio     | log-transformed ratio |
| 100         | 0.006714  | 0.6267                |
| 200         | 0.0004489 | 0.8312                |
| 500         | 7.071e-07 | 0.8912                |
| 1000        | 2.2e-16   | 0.3430                |
| 5000        | 2.2e-16   | 0.06448               |
