# Supplementary material for: Ratio-Based Analysis of Differential mRNA Processing and Expression of a Polyadenylation Factor Mutant pcfs4 Using Arabidopsis Tiling Microarray
Source: PubMed Central journal article supplement (PMC3045369; doi:10.1371/journal.pone.0014719), 2011-02-25
Supplement: pone.0014719.s005.pdf [file pone.0014719.s005.pdf]

**Table S4.** The most enriched GO terms and their corresponding genes from the 68 DPG targets of PCFS4

| <b>Gene ID</b>                                                  | <b>Gene Symbol</b> |
|-----------------------------------------------------------------|--------------------|
| <b>Response to stress; GO:0006950; p=1.39E-05</b>               |                    |
| AT3G45140                                                       | LOX2               |
| AT1G33590                                                       |                    |
| AT2G15080                                                       | AtRLP19            |
| AT4G11280                                                       | ACS6               |
| AT3G04210                                                       |                    |
| AT5G67300                                                       | MYBR1              |
| AT2G40000                                                       | HSPRO2             |
| AT5G37770                                                       | TCH2               |
| AT1G52040                                                       | MBP1               |
| AT2G15890                                                       | MEE14              |
| AT5G20250                                                       | DIN10              |
| AT4G00430                                                       | PIP1;4             |
| AT4G34150                                                       |                    |
| AT3G14210                                                       | ESM1               |
| AT3G30775                                                       | ERD5               |
| <b>Regulation of flower development; GO:0009909; p=7.78E-05</b> |                    |
| AT1G68050                                                       | FKF1               |
| AT5G15850                                                       | COL1               |
| AT5G37770                                                       | TCH2               |
| AT4G04885                                                       | PCFS4              |
