# Supplementary material for: Ratio-Based Analysis of Differential mRNA Processing and Expression of a Polyadenylation Factor Mutant pcfs4 Using Arabidopsis Tiling Microarray
Source: PubMed Central journal article supplement (PMC3045369; doi:10.1371/journal.pone.0014719), 2011-02-25
Supplement: pone.0014719.s006.pdf [file pone.0014719.s006.pdf]

**Table S5.** The most enriched GO terms and their corresponding genes from the GO analysis of the pooled DPG and DEG targets of PCFS4

| <b>TAIR Gene ID</b>                                     | <b>Gene Symbol</b> |
|---------------------------------------------------------|--------------------|
| <b>Sulfur metabolic process; GO:0006790; p=6.11E-09</b> |                    |
| AT1G59870                                               | PEN3               |
| AT2G30770                                               | CYP71A13           |
| AT3G61440                                               | CYSC1              |
| AT3G16410                                               | NSP4               |
| AT3G14210                                               | ESM1               |
| AT2G29630                                               | THIC               |
| AT5G25980                                               | TGG2               |
| AT3G03780                                               | ATMS2              |
| AT1G16410                                               | CYP79F1            |
| AT4G11280                                               | ACS6               |
| AT3G17390                                               | MTO3               |
| <b>Response to stress; GO:0006950; p=9.56E-09</b>       |                    |
| AT1G59870                                               | PEN3               |
| AT5G46490                                               | AT5G46490.1        |
| AT2G30770                                               | CYP71A13           |
| AT2G15890                                               | MEE14              |
| AT5G20250                                               | DIN10              |
| AT5G18370                                               | AT5G18370.1        |
| AT4G36140                                               | AT4G36140.1        |
| AT3G61440                                               | CYSC1              |
| AT4G00430                                               | PIP1;4             |
| AT3G09440                                               | AT3G09440.1        |
| AT4G34150                                               | AT4G34150          |
| AT3G14210                                               | ESM1               |
| AT3G50950                                               | ZAR1               |
| AT3G30775                                               | ERD5               |
| AT2G41430                                               | ERD15              |
| AT1G66090                                               | AT1G66090.1        |
| AT3G45140                                               | LOX2               |
| AT1G33590                                               | AT1G33590          |
| AT2G15080                                               | AtRLP19            |
| AT1G22770                                               | GI                 |
| AT4G11280                                               | ACS6               |
| AT3G04210                                               | AT3G04210.1        |
| AT4G35090                                               | CAT2               |
| AT5G67300                                               | MYBR1              |
| AT3G17390                                               | MTO3               |
| AT2G40000                                               | HSPRO2             |
| AT1G01120                                               | KCS1               |
| AT5G37770                                               | TCH2               |

|           |       |
|-----------|-------|
| AT1G20510 | OPCL1 |
| AT5G61420 | MYB28 |
| AT2G40140 | CZF1  |
| AT1G52040 | MBP1  |

**Circadian rhythm; GO:0007623; p=4.15E-06**

|           |      |
|-----------|------|
| AT1G22770 | GI   |
| AT3G46640 | PCL1 |
| AT1G68050 | FKF1 |
| AT5G61380 | TOC1 |
| AT5G15850 | COL1 |

**S-glycoside metabolic process; GO:0016143; p=7.18E-06**

|           |         |
|-----------|---------|
| AT1G59870 | PEN3    |
| AT3G16410 | NSP4    |
| AT3G14210 | ESM1    |
| AT5G25980 | TGG2    |
| AT1G16410 | CYP79F1 |

**Regulation of flower development; GO:0009909; p=4.00E-04**

|           |       |
|-----------|-------|
| AT4G31820 | ENP   |
| AT4G04885 | PCFS4 |
| AT1G68050 | FKF1  |
| AT5G15850 | COL1  |
| AT5G37770 | TCH2  |

---
