# Supplementary material for: Ratio-Based Analysis of Differential mRNA Processing and Expression of a Polyadenylation Factor Mutant pcfs4 Using Arabidopsis Tiling Microarray
Source: PubMed Central journal article supplement (PMC3045369; doi:10.1371/journal.pone.0014719), 2011-02-25
Supplement: pone.0014719.s007.pdf [file pone.0014719.s007.pdf]

**Table S6:** Sequences of the primers for the confirmation of DPG targets

| Gene No. | Gene ID   | Primer Name | Primer Sequence            |
|----------|-----------|-------------|----------------------------|
| No.1     | At5g52910 | p1024       | CGCTGATGTGAACGTCTGTT       |
|          |           | p1025       | CAAGCAGCAAACAGGATCAA       |
|          |           | p921        | TGCCTCCCAATAAACAGAG        |
|          |           | p922        | CATCACTGCCGCTAGACAGA       |
| No.2     | At5g02170 | p1026       | CACACGTTTCGATGAGGAAGA      |
|          |           | p1027       | TTGCTGTTTGCTTGGTGAAG       |
|          |           | p943        | CGGCTCTGATTGGATCTTTC       |
|          |           | p944        | CCGCTTACAATGCCGATTAT       |
| No.22    | At3g26510 | p1275       | TCATCAACCACCACGTCATC       |
|          |           | p1276       | CAGTGATTGCCGTTGTGAAC       |
|          |           | p1277       | CCGGAGATTTGACTTTGGAA       |
|          |           | p1278       | AACGGTTGGACGAATAAATCC      |
| No.23    | At4g37300 | p1271       | TGGACAGAGACGACGATGAG       |
|          |           | p1272       | GGATGGTCGGTGATTTTGTG       |
|          |           | p1273       | GGAGACAACAAACAAGTTGCAG     |
|          |           | p1274       | CTAGAAGGTCTGCTGGTTGG       |
| No.31    | At3g53130 | p1279       | ACTGCAAAACCTACGCGTCT       |
|          |           | p1280       | TGGGATTTTCGATGAATTGGTC     |
|          |           | p1281       | AAGGCAATGTCTGGCGTATC       |
|          |           | p1282       | AATCCCCTGCACTACCTCCT       |
| No.35    | At5g20250 | p1283       | GGCGTCACAGAGTTGCTACA       |
|          |           | p1284       | AGATGAGCGAATACGAAGCTG      |
|          |           | p1285       | TTCCGGTTTAAGCTCTGGTG       |
|          |           | p1286       | CCGTTAGCTCCGTCAGACTC       |
| No.54    | AT4G00430 | p1287       | GTCTGTTCTTGCTCGGAAG        |
|          |           | p1288       | TGGAAACCTTTGACGACTCC       |
|          |           | p1289       | TGGCAAAGGGTCTCTGAAGT       |
|          |           | p1290       | ACCAACCCGAGAAGTTGATG       |
| No.69    | AT4G34150 | p1295       | ATGATGGCGGGTATAACAAGG      |
|          |           | p1296       | GCAGGTTCTGGTACGGTGAC       |
|          |           | p1297       | ATACTCAGCACCGCCTTCTG       |
|          |           | p1298       | GAGGGTATCCTGATGGCTGA       |
| No.72    | AT2G15890 | p1299       | CGTTCGTTTCATCTCCCAAT       |
|          |           | p1300       | TCTCTGGTGCTTGAACAACG       |
|          |           | p1301       | TCTATTCTTGATGATGTTTGTCTCC  |
|          |           | p1302       | CATCTTTCATCACCAAACAA       |
| No.79    | AT3G14210 | p1303       | TTGGTGAGTGTTCTGGGAGTC      |
|          |           | p1304       | TAGGGCCAATAGGTTTGTGG       |
|          |           | p1305       | AATACAAAACCGGCAACGAG       |
|          |           | p1306       | GAACGGCGTTGTAGAAATCG       |
| No.87    | AT2G36830 | p1307       | CGTTGGCTGAGTTCATTTCA       |
|          |           | p1308       | CCAATGAAAGCACCGAAAGT       |
|          |           | p1309       | TCTTGTGTAATTTTATTCGACTTTGA |
|          |           | p1310       | GAAATTGCAATGGCCACTCT       |
| No.101   | AT5G42900 | p1311       | GGCACGGTGGTAATTCTCAT       |

|        |           |       |                           |
|--------|-----------|-------|---------------------------|
| No.106 | AT2G15050 | p1312 | GAGCCAGAGCTGCATATTCC      |
|        |           | p1313 | TGAGAGGTCAGATGGTGAAGC     |
|        |           | p1314 | ATGAATCCACTCACATGAGCA     |
|        |           | p1319 | CGGTCCAATCACAGCAAAG       |
|        |           | p1320 | CCGACGGTCTAGGGTTGTAA      |
| No.107 | AT3G30775 | p1321 | AGTTAACTGGACATAAATCGGAAAG |
|        |           | p1322 | ACAAAAATTCAACCACAAGACCA   |
|        |           | p1315 | CACGATTCAGGCGTACTTGA      |
| No.115 | AT4G27310 | p1316 | AAACCAGAACCGTTTGATGC      |
|        |           | p1317 | CGGGATTGCGTAAAGAGAGA      |
|        |           | p1318 | CATGAAAAATATTTAGCCACAGGA  |
|        |           | p1323 | CTTACGCCGTGGAAAGCTAC      |
| No.125 | AT1G55370 | p1324 | ACCGTCACCGTGATCTTCTC      |
|        |           | p1325 | CGATCGGCGTTTAAATCAAC      |
|        |           | p1326 | CAGAAAACCTGAACGGTGGTG     |
|        |           | p1327 | TTGCTTCTTTGCCACTTCAG      |
|        |           | p1328 | ATCTTCGAAAGTGGCTCCAT      |
| No.139 | AT2G41210 | p1329 | TCTGGTTGTGTATGGAGAGGTG    |
|        |           | p1330 | CGGTTAGATAAGGGGGTTGC      |
|        |           | p1331 | GGGTTCCCTACATTGCCTTCA     |
|        |           | p1332 | CCTTCAGCGTCCAATCTCAT      |
|        |           | p1333 | CTCAAGTTGTCTCTGGCGTTT     |
|        |           | p1334 | TCATTGCTATGGCTTTTAGCTG    |

---
